# Supplementary material for: Prospective thinking in a mustelid? Eira barbara (Carnivora) cache unripe fruits to consume them once ripened
Source: Springer Nature journal article supplement (doi:10.1007/s00114-011-0821-0), 2011-07-07

**Article title:** Prospective thinking in a mustelid? *Eira barbara* (Carnivora) cache unripe fruits to consume them once ripened

**Journal:** Naturwissenschaften

**Authors:** Fernando G. Soley\* and Isaías Alvarado-Díaz

**Contact address:** \*Current address: Fernando G. Soley. Department of Biological Sciences, Macquarie University, NSW 2109, Australia. Email: fsoley@gmail.com

**Online resource 1.** Camera trap pictures of tayras (*Eira barbara*) taking unripe plantains from a fruit bunch. Each arrow points at the plantain in the tayras mouth.

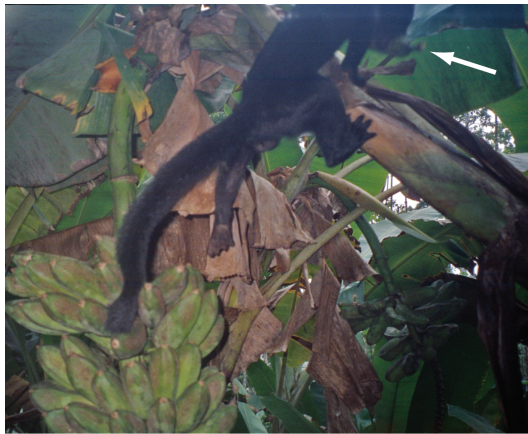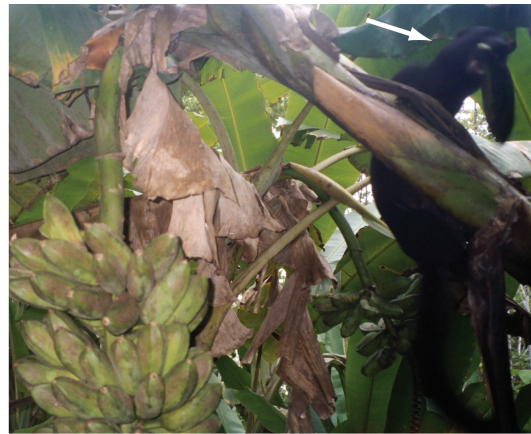

Supplement: 114_2011_821_MOESM1_ESM.pdf [file 114_2011_821_MOESM1_ESM.pdf]
